# Supplementary material
Source: MDPI journal article supplement (https://www.mdpi.com/2304-6740/2/4/620)
Supplement: s1 [file s1]

data_chhm57a
 
_audit_creation_method            SHELXL-97
_chemical_name_systematic
;
 ?
;
_chemical_name_common             ?
_chemical_melting_point           ?
_chemical_formula_moiety          'C21 H25 Cl2 Fe N O Pt S'
_chemical_formula_sum
 'C21 H25 Cl2 Fe N O Pt S'
_chemical_formula_weight          661.32
 
loop_
 _atom_type_symbol
 _atom_type_description
 _atom_type_scat_dispersion_real
 _atom_type_scat_dispersion_imag
 _atom_type_scat_source
 'C'  'C'   0.0033   0.0016
 'International Tables Vol C Tables 4.2.6.8 and 6.1.1.4'
 'H'  'H'   0.0000   0.0000
 'International Tables Vol C Tables 4.2.6.8 and 6.1.1.4'
 'N'  'N'   0.0061   0.0033
 'International Tables Vol C Tables 4.2.6.8 and 6.1.1.4'
 'O'  'O'   0.0106   0.0060
 'International Tables Vol C Tables 4.2.6.8 and 6.1.1.4'
 'S'  'S'   0.1246   0.1234
 'International Tables Vol C Tables 4.2.6.8 and 6.1.1.4'
 'Cl'  'Cl'   0.1484   0.1585
 'International Tables Vol C Tables 4.2.6.8 and 6.1.1.4'
 'Fe'  'Fe'   0.3463   0.8444
 'International Tables Vol C Tables 4.2.6.8 and 6.1.1.4'
 'Pt'  'Pt'  -1.7033   8.3905
 'International Tables Vol C Tables 4.2.6.8 and 6.1.1.4'
 
_symmetry_cell_setting            orthorhombic
_symmetry_space_group_name_H-M    P212121
 
loop_
 _symmetry_equiv_pos_as_xyz
 'x, y, z'
 '-x+1/2, -y, z+1/2'
 '-x, y+1/2, -z+1/2'
 'x+1/2, -y+1/2, -z'
 
_cell_length_a                    11.1670(10)
_cell_length_b                    13.2570(10)
_cell_length_c                    14.8780(10)
_cell_angle_alpha                 90.00
_cell_angle_beta                  90.0000(10)
_cell_angle_gamma                 90.00
_cell_volume                      2202.6(3)
_cell_formula_units_Z             4
_cell_measurement_temperature     293(2)
_cell_measurement_reflns_used     245
_cell_measurement_theta_min       3
_cell_measurement_theta_max       31
 
_exptl_crystal_description        'prism'
_exptl_crystal_colour             ?
_exptl_crystal_size_max           0.2
_exptl_crystal_size_mid           0.1
_exptl_crystal_size_min           0.1
_exptl_crystal_density_meas       ?
_exptl_crystal_density_diffrn     1.994
_exptl_crystal_density_method     'not measured'
_exptl_crystal_F_000              1280
_exptl_absorpt_coefficient_mu     7.353
_exptl_absorpt_correction_type    'empirical'
_exptl_absorpt_correction_T_min   0.42
_exptl_absorpt_correction_T_max   0.48
_exptl_absorpt_process_details    'sadabs'
 
_exptl_special_details
;
 ?
;
 
_diffrn_ambient_temperature       293(2)
_diffrn_radiation_wavelength      0.71069
_diffrn_radiation_type            MoK\a
_diffrn_radiation_source          'fine-focus sealed tube'
_diffrn_radiation_monochromator   graphite
_diffrn_measurement_device_type   'MAR234 with image plate detector'
_diffrn_measurement_method        'phi scan'
_diffrn_detector_area_resol_mean  ?
_diffrn_standards_number          ?
_diffrn_standards_interval_count  ?
_diffrn_standards_interval_time   ?
_diffrn_standards_decay_%         ?
_diffrn_reflns_number             9069
_diffrn_reflns_av_unetI/netI      0.0511
_diffrn_reflns_av_R_equivalents   0.0705
_diffrn_reflns_limit_h_min        0
_diffrn_reflns_limit_h_max        16
_diffrn_reflns_limit_k_min        -19
_diffrn_reflns_limit_k_max        19
_diffrn_reflns_limit_l_min        -21
_diffrn_reflns_limit_l_max        21
_diffrn_reflns_theta_min          2.06
_diffrn_reflns_theta_max          31.72
_reflns_number_total              6010
_reflns_number_gt                 5106
_reflns_threshold_expression      >2sigma(I)
 
_computing_data_collection        'MARXDS (Claudio Klein, 2005)'
_computing_cell_refinement        'AUTOMAR (Claudio Klein, 2007)'
_computing_data_reduction         'MARSCALE (Claudio Klein, 2007)'
_computing_structure_solution     'SHELXS-97 (Sheldrick, 1997)'
_computing_structure_refinement   'SHELXL-97 (Sheldrick, 1997)'
_computing_molecular_graphics     'ORTEP (Brueggermann and Smith, 1990)'
_computing_publication_material   'PLATON (Spek, 1990)'
 
 
_refine_special_details
;
 Refinement of F^2^ against ALL reflections.  The weighted R-factor wR and
 goodness of fit S are based on F^2^, conventional R-factors R are based
 on F, with F set to zero for negative F^2^. The threshold expression of
 F^2^ > 2sigma(F^2^) is used only for calculating R-factors(gt) etc. and is
 not relevant to the choice of reflections for refinement.  R-factors based
 on F^2^ are statistically about twice as large as those based on F, and R-
 factors based on ALL data will be even larger.
Regarding the crystal refinement parameter, for the structural resolution,
 it has been  considered only reflections that have a value max of theta =
 25� (ACTA 50). Reflections between 25� and 32� have not been taken into
 account due to the poor quality of the reflections over this value.
The poor quality of reflections could be due to the fact that the crystal
does not diffract very well and to the kind of detector (image plate with
spindle axis only) that was used. Other attempts of crystallization were
done, but no single crystals of better quality were obtained.
;
 
_refine_ls_structure_factor_coef  Fsqd
_refine_ls_matrix_type            full
_refine_ls_weighting_scheme       calc
_refine_ls_weighting_details
 'calc w=1/[\s^2^(Fo^2^)+(0.0654P)^2^+4.8984P] where P=(Fo^2^+2Fc^2^)/3'
_atom_sites_solution_primary      direct
_atom_sites_solution_secondary    difmap
_atom_sites_solution_hydrogens    geom
_refine_ls_hydrogen_treatment     mixed
_refine_ls_extinction_method      none
_refine_ls_extinction_coef        ?
_refine_ls_abs_structure_details
 'Flack H D (1983), Acta Cryst. A39, 876-881'
_refine_ls_abs_structure_Flack    0.00(2)
_chemical_absolute_configuration  rm
_refine_ls_number_reflns          6010
_refine_ls_number_parameters      254
_refine_ls_number_restraints      0
_refine_ls_R_factor_all           0.0514
_refine_ls_R_factor_gt            0.0418
_refine_ls_wR_factor_ref          0.1414
_refine_ls_wR_factor_gt           0.1301
_refine_ls_goodness_of_fit_ref    1.196
_refine_ls_restrained_S_all       1.196
_refine_ls_shift/su_max           0.000
_refine_ls_shift/su_mean          0.000
 
loop_
 _atom_site_label
 _atom_site_type_symbol
 _atom_site_fract_x
 _atom_site_fract_y
 _atom_site_fract_z
 _atom_site_U_iso_or_equiv
 _atom_site_adp_type
 _atom_site_occupancy
 _atom_site_symmetry_multiplicity
 _atom_site_calc_flag
 _atom_site_refinement_flags
 _atom_site_disorder_assembly
 _atom_site_disorder_group
Pt Pt 0.12335(3) 0.99529(2) 0.09761(2) 0.03964(10) Uani 1 1 d . . .
Fe Fe 0.43614(10) 1.14721(8) 0.26627(9) 0.0401(2) Uani 1 1 d . . .
S S -0.0330(2) 0.9028(2) 0.13554(18) 0.0509(5) Uani 1 1 d . . .
Cl1 Cl 0.2543(3) 0.8697(2) 0.1293(3) 0.0711(8) Uani 1 1 d . . .
Cl2 Cl -0.0009(3) 1.1249(2) 0.0596(3) 0.0783(10) Uani 1 1 d . . .
O O -0.1008(8) 0.8613(8) 0.0617(5) 0.076(3) Uani 1 1 d . . .
N N 0.2624(5) 1.0782(5) 0.0527(5) 0.0371(14) Uani 1 1 d . . .
C1 C 0.5010(8) 1.0079(8) 0.2657(9) 0.063(3) Uani 1 1 d . . .
H1 H 0.4538 0.9511 0.2567 0.075 Uiso 1 1 calc R . .
C2 C 0.5245(12) 1.0522(9) 0.3462(8) 0.064(3) Uani 1 1 d . . .
H2 H 0.4980 1.0281 0.4014 0.077 Uiso 1 1 calc R . .
C3 C 0.5916(10) 1.1360(9) 0.3349(11) 0.072(4) Uani 1 1 d . . .
H3 H 0.6165 1.1807 0.3794 0.087 Uiso 1 1 calc R . .
C4 C 0.6151(10) 1.1419(11) 0.2460(9) 0.076(4) Uani 1 1 d . . .
H4 H 0.6615 1.1915 0.2187 0.091 Uiso 1 1 calc R . .
C5 C 0.5588(12) 1.0615(13) 0.2007(11) 0.089(5) Uani 1 1 d . . .
H5 H 0.5607 1.0478 0.1394 0.107 Uiso 1 1 calc R . .
C6 C 0.3670(10) 1.2731(5) 0.2095(6) 0.049(2) Uani 1 1 d . . .
H6 H 0.4087 1.3176 0.1727 0.059 Uiso 1 1 calc R . .
C7 C 0.3559(10) 1.2792(6) 0.3032(8) 0.055(2) Uani 1 1 d . . .
H7 H 0.3870 1.3309 0.3385 0.066 Uiso 1 1 calc R . .
C8 C 0.2913(9) 1.1967(7) 0.3362(8) 0.056(2) Uani 1 1 d . . .
H8 H 0.2733 1.1832 0.3961 0.067 Uiso 1 1 calc R . .
C9 C 0.2585(8) 1.1373(7) 0.2601(7) 0.0448(18) Uani 1 1 d . . .
H9 H 0.2157 1.0771 0.2619 0.054 Uiso 1 1 calc R . .
C10 C 0.3019(7) 1.1850(6) 0.1813(6) 0.0414(18) Uani 1 1 d . . .
C11 C 0.3149(7) 1.1506(5) 0.0911(5) 0.0345(14) Uani 1 1 d . . .
H11 H 0.3692 1.1862 0.0560 0.041 Uiso 1 1 calc R . .
C12 C 0.3012(8) 1.0562(7) -0.0405(6) 0.0425(18) Uani 1 1 d . . .
H12 H 0.2607 0.9934 -0.0573 0.051 Uiso 1 1 calc R . .
C13 C 0.2557(9) 1.1354(10) -0.1055(8) 0.061(3) Uani 1 1 d . . .
H13 H 0.1712 1.1449 -0.0967 0.073 Uiso 1 1 calc R . .
H13A H 0.2703 1.1137 -0.1660 0.073 Uiso 1 1 calc R . .
H13B H 0.2966 1.1980 -0.0948 0.073 Uiso 1 1 calc R . .
C14 C 0.4355(9) 1.0338(7) -0.0475(6) 0.0473(19) Uani 1 1 d . . .
C15 C 0.5153(10) 1.1066(9) -0.0573(8) 0.062(3) Uani 1 1 d . . .
H15 H 0.4895 1.1725 -0.0667 0.075 Uiso 1 1 calc R . .
C16 C 0.6389(11) 1.0858(12) -0.0537(9) 0.075(4) Uani 1 1 d . . .
H16 H 0.6938 1.1380 -0.0605 0.090 Uiso 1 1 calc R . .
C17 C 0.6777(12) 0.9929(14) -0.0406(9) 0.085(4) Uani 1 1 d . . .
H17 H 0.7595 0.9803 -0.0372 0.102 Uiso 1 1 calc R . .
C18 C 0.5934(15) 0.9107(13) -0.0318(11) 0.088(5) Uani 1 1 d . . .
H18 H 0.6194 0.8447 -0.0238 0.105 Uiso 1 1 calc R . .
C19 C 0.4732(12) 0.9337(8) -0.0356(8) 0.060(3) Uani 1 1 d . . .
H19 H 0.4167 0.8825 -0.0302 0.072 Uiso 1 1 calc R . .
C20 C -0.1337(13) 0.9803(12) 0.2004(10) 0.093(5) Uani 1 1 d . . .
H20 H -0.1575 1.0377 0.1654 0.112 Uiso 1 1 calc R . .
H20A H -0.0940 1.0027 0.2540 0.112 Uiso 1 1 calc R . .
H20B H -0.2032 0.9417 0.2164 0.112 Uiso 1 1 calc R . .
C21 C -0.0004(11) 0.8041(10) 0.2095(9) 0.075(4) Uani 1 1 d . . .
H21 H 0.0536 0.7576 0.1810 0.090 Uiso 1 1 calc R . .
H21A H -0.0731 0.7696 0.2252 0.090 Uiso 1 1 calc R . .
H21B H 0.0362 0.8307 0.2628 0.090 Uiso 1 1 calc R . .
 
loop_
 _atom_site_aniso_label
 _atom_site_aniso_U_11
 _atom_site_aniso_U_22
 _atom_site_aniso_U_33
 _atom_site_aniso_U_23
 _atom_site_aniso_U_13
 _atom_site_aniso_U_12
Pt 0.03866(15) 0.03125(13) 0.04901(16) -0.00118(12) 0.00014(11) -0.00484(12)
Fe 0.0392(6) 0.0299(5) 0.0514(6) 0.0020(5) -0.0008(5) 0.0001(4)
S 0.0461(12) 0.0529(12) 0.0537(12) -0.0005(10) -0.0005(9) -0.0176(10)
Cl1 0.0574(15) 0.0481(13) 0.108(2) 0.0249(14) 0.0063(14) 0.0024(11)
Cl2 0.0546(15) 0.0491(13) 0.131(3) 0.0164(16) 0.0074(17) 0.0112(11)
O 0.073(5) 0.114(7) 0.040(3) 0.027(4) -0.021(3) -0.043(5)
N 0.029(3) 0.028(3) 0.054(4) 0.002(3) 0.018(3) -0.014(2)
C1 0.038(4) 0.051(5) 0.098(8) -0.016(6) -0.032(5) 0.019(4)
C2 0.076(7) 0.064(6) 0.052(5) 0.021(5) 0.002(5) 0.022(6)
C3 0.046(5) 0.057(6) 0.114(11) -0.009(7) -0.020(6) -0.007(5)
C4 0.046(5) 0.101(9) 0.081(8) 0.039(7) 0.005(5) -0.013(6)
C5 0.061(7) 0.124(12) 0.082(8) -0.019(9) -0.004(7) 0.056(8)
C6 0.069(5) 0.024(3) 0.055(5) -0.011(3) -0.022(5) -0.003(4)
C7 0.061(6) 0.029(3) 0.075(6) -0.003(4) 0.013(5) 0.011(4)
C8 0.044(5) 0.043(4) 0.081(7) -0.002(5) 0.008(4) -0.002(4)
C9 0.039(4) 0.045(4) 0.051(5) 0.003(4) -0.001(3) -0.002(3)
C10 0.035(4) 0.027(3) 0.062(5) 0.001(3) -0.016(3) -0.002(3)
C11 0.036(3) 0.030(3) 0.038(3) 0.007(3) -0.010(3) 0.001(2)
C12 0.035(4) 0.053(5) 0.040(4) -0.006(4) 0.005(3) -0.007(3)
C13 0.047(5) 0.082(7) 0.054(6) 0.013(6) 0.001(4) 0.006(5)
C14 0.049(5) 0.049(5) 0.044(4) 0.000(4) 0.005(4) -0.001(4)
C15 0.055(6) 0.064(6) 0.068(7) -0.011(5) 0.015(5) -0.007(5)
C16 0.051(6) 0.113(10) 0.061(6) -0.017(7) 0.008(5) -0.023(7)
C17 0.070(7) 0.129(14) 0.057(6) 0.002(9) 0.010(5) 0.031(9)
C18 0.100(12) 0.083(9) 0.081(9) -0.011(8) 0.017(8) 0.029(8)
C19 0.076(7) 0.047(5) 0.058(6) -0.003(4) -0.009(5) 0.024(5)
C20 0.084(9) 0.115(11) 0.079(8) -0.016(8) 0.043(8) -0.016(10)
C21 0.064(7) 0.079(7) 0.081(8) 0.039(7) -0.023(6) -0.031(6)
 
_geom_special_details
;
 All esds (except the esd in the dihedral angle between two l.s. planes)
 are estimated using the full covariance matrix.  The cell esds are taken
 into account individually in the estimation of esds in distances, angles
 and torsion angles; correlations between esds in cell parameters are only
 used when they are defined by crystal symmetry.  An approximate (isotropic)
 treatment of cell esds is used for estimating esds involving l.s. planes.
;
 
loop_
 _geom_bond_atom_site_label_1
 _geom_bond_atom_site_label_2
 _geom_bond_distance
 _geom_bond_site_symmetry_2
 _geom_bond_publ_flag
Pt N 2.017(5) . ?
Pt S 2.206(2) . ?
Pt Cl1 2.266(3) . ?
Pt Cl2 2.280(3) . ?
Fe C1 1.983(9) . ?
Fe C9 1.990(9) . ?
Fe C2 1.994(10) . ?
Fe C3 2.020(12) . ?
Fe C4 2.023(12) . ?
Fe C6 2.023(8) . ?
Fe C10 2.024(8) . ?
Fe C5 2.030(12) . ?
Fe C8 2.032(11) . ?
Fe C7 2.042(8) . ?
S O 1.444(8) . ?
S C21 1.748(11) . ?
S C20 1.803(13) . ?
N C11 1.261(9) . ?
N C12 1.481(11) . ?
C1 C2 1.358(16) . ?
C1 C5 1.36(2) . ?
C1 H1 0.9300 . ?
C2 C3 1.351(17) . ?
C2 H2 0.9300 . ?
C3 C4 1.35(2) . ?
C3 H3 0.9300 . ?
C4 C5 1.41(2) . ?
C4 H4 0.9300 . ?
C5 H5 0.9300 . ?
C6 C7 1.402(15) . ?
C6 C10 1.439(10) . ?
C6 H6 0.9300 . ?
C7 C8 1.399(14) . ?
C7 H7 0.9300 . ?
C8 C9 1.428(15) . ?
C8 H8 0.9300 . ?
C9 C10 1.418(13) . ?
C9 H9 0.9300 . ?
C10 C11 1.424(12) . ?
C11 H11 0.9300 . ?
C12 C13 1.516(15) . ?
C12 C14 1.532(13) . ?
C12 H12 0.9800 . ?
C13 H13 0.9600 . ?
C13 H13A 0.9600 . ?
C13 H13B 0.9600 . ?
C14 C15 1.321(15) . ?
C14 C19 1.404(13) . ?
C15 C16 1.409(17) . ?
C15 H15 0.9300 . ?
C16 C17 1.32(2) . ?
C16 H16 0.9300 . ?
C17 C18 1.45(2) . ?
C17 H17 0.9300 . ?
C18 C19 1.377(19) . ?
C18 H18 0.9300 . ?
C19 H19 0.9300 . ?
C20 H20 0.9600 . ?
C20 H20A 0.9600 . ?
C20 H20B 0.9600 . ?
C21 H21 0.9600 . ?
C21 H21A 0.9600 . ?
C21 H21B 0.9600 . ?
 
loop_
 _geom_angle_atom_site_label_1
 _geom_angle_atom_site_label_2
 _geom_angle_atom_site_label_3
 _geom_angle
 _geom_angle_site_symmetry_1
 _geom_angle_site_symmetry_3
 _geom_angle_publ_flag
N Pt S 175.4(2) . . ?
N Pt Cl1 88.4(2) . . ?
S Pt Cl1 92.82(10) . . ?
N Pt Cl2 88.6(2) . . ?
S Pt Cl2 90.04(10) . . ?
Cl1 Pt Cl2 176.71(12) . . ?
C1 Fe C9 107.6(4) . . ?
C1 Fe C2 39.9(5) . . ?
C9 Fe C2 118.6(5) . . ?
C1 Fe C3 67.6(4) . . ?
C9 Fe C3 151.1(5) . . ?
C2 Fe C3 39.3(5) . . ?
C1 Fe C4 66.8(5) . . ?
C9 Fe C4 167.3(5) . . ?
C2 Fe C4 65.0(5) . . ?
C3 Fe C4 39.1(6) . . ?
C1 Fe C6 154.9(4) . . ?
C9 Fe C6 69.8(4) . . ?
C2 Fe C6 163.5(4) . . ?
C3 Fe C6 126.8(4) . . ?
C4 Fe C6 110.1(5) . . ?
C1 Fe C10 119.9(3) . . ?
C9 Fe C10 41.3(4) . . ?
C2 Fe C10 153.6(5) . . ?
C3 Fe C10 166.1(5) . . ?
C4 Fe C10 130.3(5) . . ?
C6 Fe C10 41.6(3) . . ?
C1 Fe C5 39.7(6) . . ?
C9 Fe C5 127.8(6) . . ?
C2 Fe C5 66.3(6) . . ?
C3 Fe C5 67.8(6) . . ?
C4 Fe C5 40.7(6) . . ?
C6 Fe C5 121.2(6) . . ?
C10 Fe C5 109.8(5) . . ?
C1 Fe C8 126.4(5) . . ?
C9 Fe C8 41.6(4) . . ?
C2 Fe C8 107.0(5) . . ?
C3 Fe C8 116.7(6) . . ?
C4 Fe C8 150.9(6) . . ?
C6 Fe C8 69.1(5) . . ?
C10 Fe C8 69.6(4) . . ?
C5 Fe C8 164.6(6) . . ?
C1 Fe C7 163.6(5) . . ?
C9 Fe C7 68.4(4) . . ?
C2 Fe C7 126.7(5) . . ?
C3 Fe C7 107.7(5) . . ?
C4 Fe C7 120.3(6) . . ?
C6 Fe C7 40.4(4) . . ?
C10 Fe C7 68.3(4) . . ?
C5 Fe C7 154.9(6) . . ?
C8 Fe C7 40.2(4) . . ?
O S C21 107.6(6) . . ?
O S C20 107.3(7) . . ?
C21 S C20 102.7(8) . . ?
O S Pt 115.6(3) . . ?
C21 S Pt 114.3(4) . . ?
C20 S Pt 108.3(5) . . ?
C11 N C12 116.0(6) . . ?
C11 N Pt 128.4(6) . . ?
C12 N Pt 115.3(5) . . ?
C2 C1 C5 108.0(11) . . ?
C2 C1 Fe 70.4(6) . . ?
C5 C1 Fe 72.0(7) . . ?
C2 C1 H1 126.0 . . ?
C5 C1 H1 126.0 . . ?
Fe C1 H1 123.2 . . ?
C3 C2 C1 110.7(12) . . ?
C3 C2 Fe 71.4(7) . . ?
C1 C2 Fe 69.6(6) . . ?
C3 C2 H2 124.7 . . ?
C1 C2 H2 124.7 . . ?
Fe C2 H2 125.9 . . ?
C2 C3 C4 106.1(12) . . ?
C2 C3 Fe 69.3(6) . . ?
C4 C3 Fe 70.6(8) . . ?
C2 C3 H3 127.0 . . ?
C4 C3 H3 127.0 . . ?
Fe C3 H3 124.8 . . ?
C3 C4 C5 109.7(12) . . ?
C3 C4 Fe 70.3(7) . . ?
C5 C4 Fe 69.9(7) . . ?
C3 C4 H4 125.1 . . ?
C5 C4 H4 125.1 . . ?
Fe C4 H4 126.2 . . ?
C1 C5 C4 105.4(12) . . ?
C1 C5 Fe 68.3(7) . . ?
C4 C5 Fe 69.4(7) . . ?
C1 C5 H5 127.3 . . ?
C4 C5 H5 127.3 . . ?
Fe C5 H5 126.5 . . ?
C7 C6 C10 107.0(9) . . ?
C7 C6 Fe 70.5(5) . . ?
C10 C6 Fe 69.2(4) . . ?
C7 C6 H6 126.5 . . ?
C10 C6 H6 126.5 . . ?
Fe C6 H6 125.3 . . ?
C8 C7 C6 110.5(9) . . ?
C8 C7 Fe 69.5(5) . . ?
C6 C7 Fe 69.1(5) . . ?
C8 C7 H7 124.8 . . ?
C6 C7 H7 124.8 . . ?
Fe C7 H7 128.2 . . ?
C7 C8 C9 106.6(10) . . ?
C7 C8 Fe 70.3(6) . . ?
C9 C8 Fe 67.6(6) . . ?
C7 C8 H8 126.7 . . ?
C9 C8 H8 126.7 . . ?
Fe C8 H8 126.9 . . ?
C10 C9 C8 108.8(8) . . ?
C10 C9 Fe 70.6(5) . . ?
C8 C9 Fe 70.8(6) . . ?
C10 C9 H9 125.6 . . ?
C8 C9 H9 125.6 . . ?
Fe C9 H9 124.6 . . ?
C9 C10 C11 132.1(7) . . ?
C9 C10 C6 107.1(8) . . ?
C11 C10 C6 118.9(8) . . ?
C9 C10 Fe 68.0(5) . . ?
C11 C10 Fe 115.7(6) . . ?
C6 C10 Fe 69.1(5) . . ?
N C11 C10 128.6(7) . . ?
N C11 H11 115.7 . . ?
C10 C11 H11 115.7 . . ?
N C12 C13 111.2(8) . . ?
N C12 C14 112.9(8) . . ?
C13 C12 C14 114.8(8) . . ?
N C12 H12 105.7 . . ?
C13 C12 H12 105.7 . . ?
C14 C12 H12 105.7 . . ?
C12 C13 H13 109.5 . . ?
C12 C13 H13A 109.5 . . ?
H13 C13 H13A 109.5 . . ?
C12 C13 H13B 109.5 . . ?
H13 C13 H13B 109.5 . . ?
H13A C13 H13B 109.5 . . ?
C15 C14 C19 120.2(11) . . ?
C15 C14 C12 121.8(10) . . ?
C19 C14 C12 117.8(9) . . ?
C14 C15 C16 120.8(12) . . ?
C14 C15 H15 119.6 . . ?
C16 C15 H15 119.6 . . ?
C17 C16 C15 120.7(13) . . ?
C17 C16 H16 119.6 . . ?
C15 C16 H16 119.6 . . ?
C16 C17 C18 120.2(12) . . ?
C16 C17 H17 119.9 . . ?
C18 C17 H17 119.9 . . ?
C19 C18 C17 117.7(14) . . ?
C19 C18 H18 121.2 . . ?
C17 C18 H18 121.2 . . ?
C18 C19 C14 120.4(13) . . ?
C18 C19 H19 119.8 . . ?
C14 C19 H19 119.8 . . ?
S C20 H20 109.5 . . ?
S C20 H20A 109.5 . . ?
H20 C20 H20A 109.5 . . ?
S C20 H20B 109.5 . . ?
H20 C20 H20B 109.5 . . ?
H20A C20 H20B 109.5 . . ?
S C21 H21 109.5 . . ?
S C21 H21A 109.5 . . ?
H21 C21 H21A 109.5 . . ?
S C21 H21B 109.5 . . ?
H21 C21 H21B 109.5 . . ?
H21A C21 H21B 109.5 . . ?
 
_diffrn_measured_fraction_theta_max    0.920
_diffrn_reflns_theta_full              25.00
_diffrn_measured_fraction_theta_full   0.952
_refine_diff_density_max    1.522
_refine_diff_density_min   -1.764
_refine_diff_density_rms    0.200
